# Supplementary material
Source: PubMed Central journal article supplement (PMC4258506)

## Blood urea nitrogen

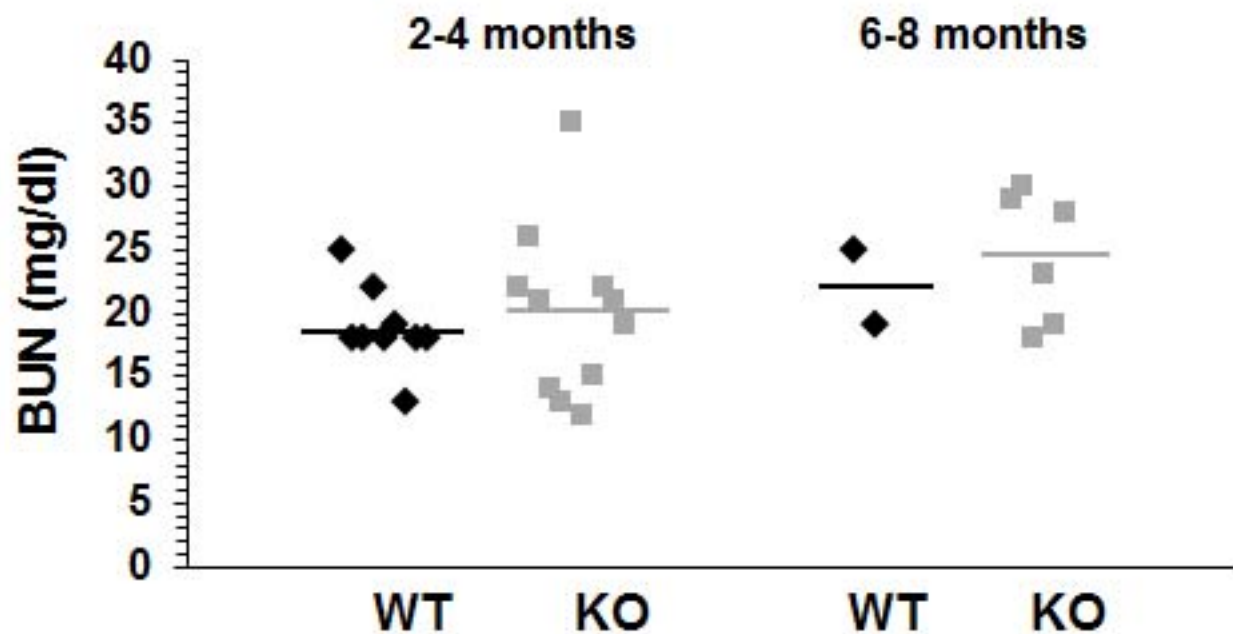

## Blood Creatinine

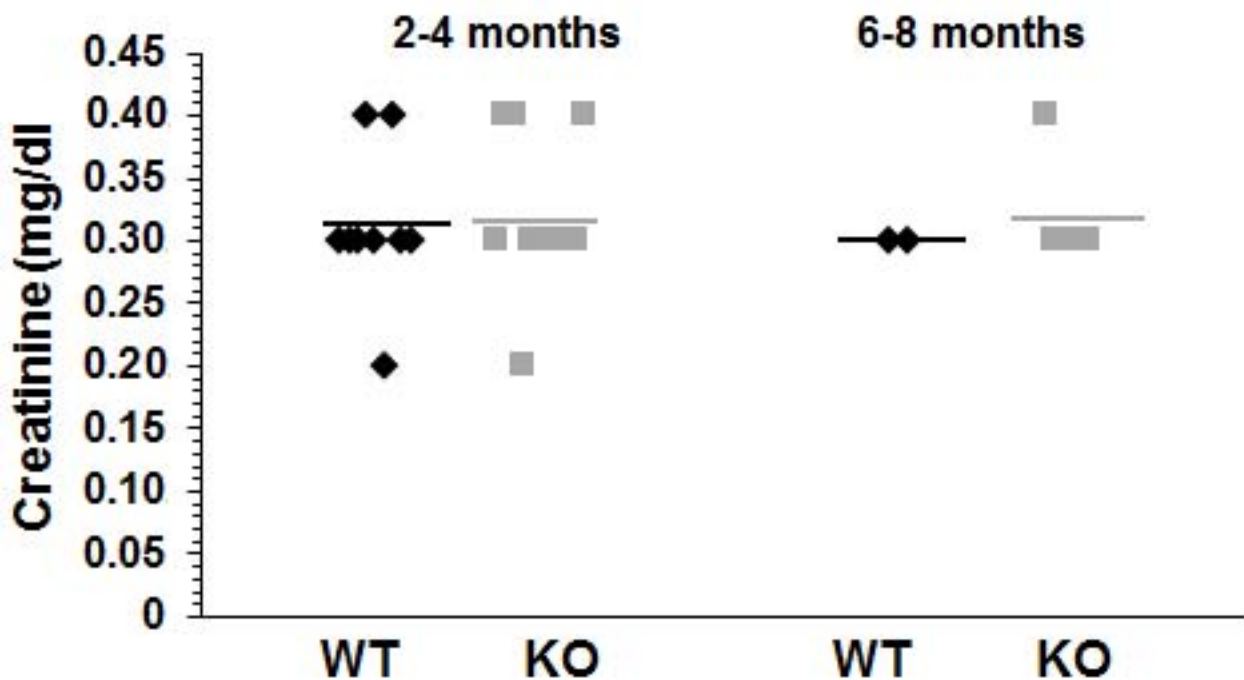

Supplement: mmc2.pdf [file mmc2.pdf]
